# Supplementary material for: Multi-functionality of Ga/ZSM-5 catalysts during anaerobic and aerobic aromatisation of n-decane
Source: Royal Society of Chemistry journal article supplement (doi:10.1039/c2sc20683h), 2012-01-01
Supplement: c2sc20683h.pdf [file c2sc20683h.pdf]

## Multi-functionality of Ga/ZSM-5 catalysts during anaerobic and aerobic aromatisation of *n*-decane

Sivaram Pradhan, Rhys Lloyd Jonathan K. Bartley, Donald Bethell, Stan Golunski, Robert L. Jenkins, and Graham J. Hutchings

### FT-IR detection of bridged hydroxyl species responsible for Brønsted acidity in ZSM-5

Sample preparation: ZSM-5 and 3.1%Ga/ZSM-5 were ground in KBr and pressed into discs.

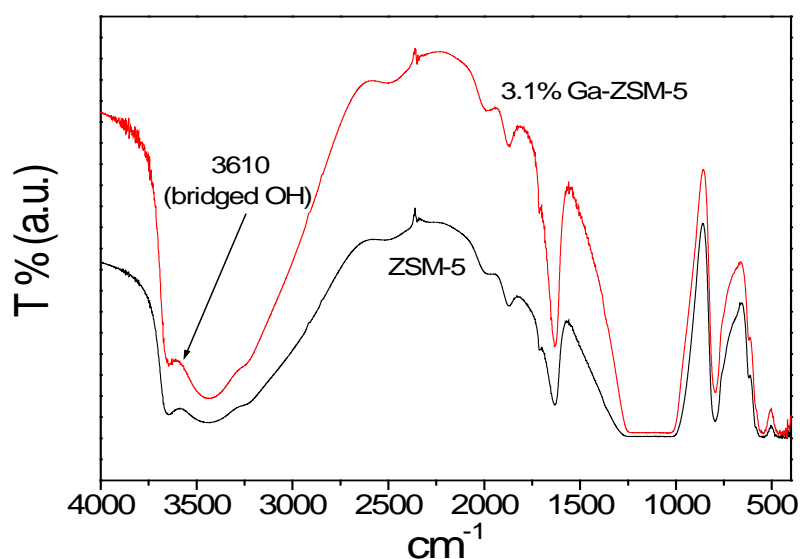

FT-IR spectra of ZSM-5 and 3.1%Ga-ZSM-5.

Results and discussion: The complex vibrational spectrum of a zeolite includes the bridging hydroxyl groups (Si-OH-Al) responsible for Brønsted acidity, which give rise to IR absorption at  $3610\text{ cm}^{-1}$  [a]. As seen in the figure above, no significant difference between the parent and Ga-modified zeolite was observed at this frequency, indicating that there was no substantial exchange of Brønsted acid sites by ionic gallium [b].

a. V de O Rodrigues et al., J. Phys Chem. C., 114 (2010) 4557

b. M Garcia-Sanchez et al., J. Catal., 219 (2003) 352
